# Supplementary material for: Optimized Decellularization of a Porcine Fasciocutaneaous Flap
Source: MDPI journal article supplement (doi:10.3390/bioengineering11040321), 2024-03-27
Supplement: s1 [file s1]

## Supplemental Materials

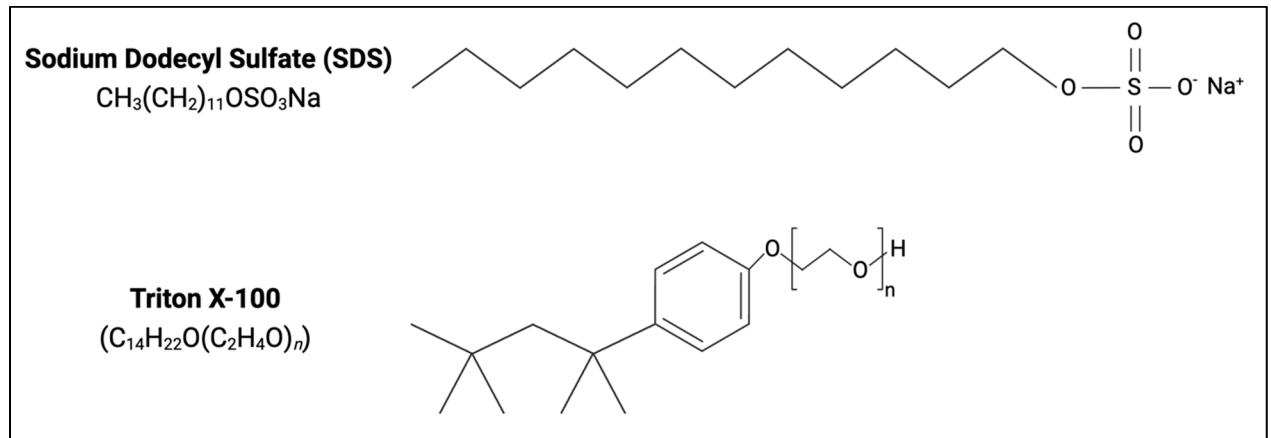

**Figure S1** - The chemical formulas and structures of detergents used for decellularization.

**Table S1** – List of growth factors included in the growth factor array.

|                 |                                                  |
|-----------------|--------------------------------------------------|
| <b>AREG</b>     | Amphiregulin                                     |
| <b>bFGF</b>     | Fibroblast growth factor 2                       |
| <b>b-NGF</b>    | Beta-nerve growth factor                         |
| <b>EGF</b>      | Pro-epidermal growth factor                      |
| <b>EGF R</b>    | Epidermal growth factor receptor                 |
| <b>FGF-4</b>    | Fibroblast growth factor 4                       |
| <b>FGF-6</b>    | Fibroblast growth factor 6                       |
| <b>FGF-7</b>    | Fibroblast growth factor 7                       |
| <b>GCSF</b>     | Granulocyte colony-stimulating factor            |
| <b>GDNF</b>     | Glial cell line-derived neurotrophic factor      |
| <b>GM-CSF</b>   | Granulocyte-macrophage colony-stimulating factor |
| <b>HB-EGF</b>   | Proheparin-binding EGF-like growth factor        |
| <b>HGF</b>      | Hepatocyte growth factor                         |
| <b>IGFBP-1</b>  | Insulin-like growth factor-binding protein 1     |
| <b>IGFBP-2</b>  | Insulin-like growth factor-binding protein 2     |
| <b>IGFBP-3</b>  | Insulin-like growth factor-binding protein 3     |
| <b>IGFBP-4</b>  | Insulin-like growth factor-binding protein 4     |
| <b>IGFBP-6</b>  | Insulin-like growth factor-binding protein 6     |
| <b>IGF-I</b>    | Insulin-like growth factor I                     |
| <b>IGF-I R</b>  | Insulin-like growth factor 1 receptor            |
| <b>IGF-II</b>   | Insulin-like growth factor II                    |
| <b>M-CSF</b>    | Macrophage colony-stimulating factor 1           |
| <b>M-CSF R</b>  | Macrophage colony-stimulating factor 1 receptor  |
| <b>NT-3</b>     | Neurotrophin-3                                   |
| <b>NT-4</b>     | Neurotrophin-4                                   |
| <b>PDGF R a</b> | Platelet-derived growth factor receptor alpha    |
| <b>PDGF R b</b> | Platelet-derived growth factor receptor beta     |
| <b>PDGF-AA</b>  | Platelet-derived growth factor subunit A         |
| <b>PDGF-AB</b>  | Platelet-derived growth factor subunit B         |
| <b>PDGF-BB</b>  | Platelet-derived growth factor subunit B         |
| <b>PLGF</b>     | Placenta growth factor                           |
| <b>SCF</b>      | Kit ligand                                       |
| <b>SCF R</b>    | Mast/stem cell growth factor receptor Kit        |

|                |                                                 |
|----------------|-------------------------------------------------|
| <b>TGF-a</b>   | Protransforming growth factor alpha             |
| <b>TGF-b 1</b> | Transforming growth factor beta-1 proprotein    |
| <b>TGF-b 2</b> | Transforming growth factor beta-2 proprotein    |
| <b>TGF-b 3</b> | Transforming growth factor beta-3 proprotein    |
| <b>VEGF</b>    | Vascular endothelial growth factor A, long form |
| <b>VEGF R2</b> | Vascular endothelial growth factor receptor 2   |
| <b>VEGF R3</b> | Vascular endothelial growth factor receptor 3   |
| <b>VEGF-D</b>  | Vascular endothelial growth factor D            |
